# Supplementary material
Source: PubMed Central journal article supplement (PMC2781505)
Supplement: supp_M109.052969_jbc.M109.052969-1.pdf [file supp_M109.052969_jbc.M109.052969-1.pdf]

```

Fox-3   1 .....MAQPYPPAQYPPPPQNGIPAEYAPPPPHPT
          | | | | | | | | | | | | | | | | | |
Fox-2   1 MEKKKNVTOGNOEPTTIPDAHVQFFTTIPFPFPQNGIPTEYG. VPH T
          | | | | | | | | | | | | | | | | | |
Fox-1   1 MNCERFQLRGNOEAAAAPDTMAQFYASAQF . APPQNGIPAEYTAAPHPHA

Fox-3  31 QDYSGQTPVPEHGMHTLYTPAQTHPEQPGT EASTOPTAGTQTVPQADEAA
          | | | | | | | | | | | | | | | | | |
Fox-2  48 QDYAGQTS . EHNLTLYGSTQPHGEQSSN .SPSNQNGSLTQTEGGA . . .
          | | | | | | | | | | | | | | | | | |
Fox-1  50 PEYTGQTIWP .DHTLNLYFPPTQTHEQSADTSAQTVSGTATQIDDA . . .

Fox-3  81 QTDNQ . QLHPSDPT E.KOOPKRLHVSNIIPFRFRDPLDROMFGQFGKILD
          | | | | | | | | | | | | | | | | | |
Fox-2  91 QTDGQOSQTSSENSEKSTPKRLHVSNIIPFRFRDPLDROMFGQFGKILD
          | | | | | | | | | | | | | | | | | |
Fox-1  96 PTDG . QFQTPSENTESKSPKRLHVSNIIPFRFRDPLDROMFGQFGKILD

Fox-3  128 VEIIFNERGSKGFVVFETSSDADRAREKLNGLIVEGRKIEVNNATARV
          | | | | | | | | | | | | | | | | | |
Fox-2  141 VEIIFNERGSKGFVVFENSADADRAREKLGTVVEGRKIEVNNATARV
          | | | | | | | | | | | | | | | | | |
Fox-1  145 VEIIFNERGSKGFVVFENSADADRAREKLGTVVEGRKIEVNNATARV

Fox-3  178 MTNKKPGNPYANGWKLNPVVGTVYGPYFVAVTSFPYPTT .GTAVAYRGAH
          | | | | | | | | | | | | | | | | | |
Fox-2  191 MTNKKNVTPYANGWKLSPVVGAVYGPELYAASSFOADVSLGNEAAVP . . .
          | | | | | | | | | | | | | | | | | |
Fox-1  195 MTNKKTVNPTYNGWKLNPVVGAVYSPDFYAGTVLLQAN . .OEGSSM . . .

Fox-3  227 LRGRGRAVYNTFRAAAPPPPIPTYGAALEQTLVKMPVPWAGLAPCPLPPO
          | | | | | | | | | | | | | | | | | |
Fox-2  238 LSGRGG . INTY . . . IPLLIPGFPPYPTAATTA . . . . . AAFRGAHL . R
          | | | | | | | | | | | | | | | | | |
Fox-1  240 YSGPSS . L . VY . . . TS . AMPGFYP . AATAA . . . . . AAYRGAHL . R

Fox-3  277 QTPEPAYPTSP . AFPPISCFASRVVYQDGFYGAELVGGYAAAYRYAOPAAA
          | | | | | | | | | | | | | | | | | |
Fox-2  274 GRGRIVYGAVR . AVPPTAIPAYPGVYQDGFYGAELVGGYAAAYRYAOPATA
          | | | | | | | | | | | | | | | | | |
Fox-1  273 GRGRIVYNTFRAAAAPPPPIPAYGGVYQDGFYGAELVGGYAAAYRYAOPTPA

Fox-3  327 T . . . . . AAAYSDSYGRVYAAADPYHHTIGPTATYSIGTM . . . . .
          | | | | | | | | | | | | | | | | | |
Fox-2  324 TAATAAAAAAAAAAYSDCYGRVY . TADPY . HALAPAAASYGVGAV . . . . .
          | | | | | | | | | | | | | | | | | |
Fox-1  324 T . . . . . AAAYSDSYGRVY . AADPYHHTLAPPTYGVGANNAFAPLTDA

Fox-3  361 . . . . . ASLCRGGYSRFTPY* 374
          | | | | | | | | | | | | | | | | | |
Fox-2  374 . . . . . ASLYRGGYSRFAPY* 377
          | | | | | | | | | | | | | | | | | |
Fox-1  366 KTRSHADDVGLVLSSLQ&SIYRGGYNRFAPY* 396

```

**Figure S1. Amino acid alignment of the Fox-1 gene family.** Among several isoforms for Fox-2 and Fox-1, F011 and A016 published previously (Nakahata & Kawamoto, 2005, *Nucleic Acids Res* **33**, 2078) are shown as Fox-2 and Fox-1, respectively. The underlined amino acids in Fox-3 indicate the sequences obtained by MS analysis. The blue and green letters in Fox-3 can be included or excluded depending on alternative pre-mRNA splicing, therefore potentially 4 isoforms exist. The red letters indicate the RNA recognition motif. The vertical lines and colons between sequences indicate identical and similar aa, respectively, compared to Fox-2.

**A**

MTQALPR  
 GSHSQSSSPGALTGR  
 QTAAAAATFSEQVGGGSGGAGR  
 EMLSSTYPVWVK  
 DHIEVVGSSMPLIGDHQDEDK  
 TYATAEPFIDAK  
 SLKPDFVLIR  
 VLLVIDEPHTDWAK  
 KLGTEEFPLIDQTFYPNHK  
 VDNQHDFQDIASVVALTK  
 QLIVELVVNK  
 ASTAAPVASPAAPSPGSSGGGGFFSSLSNAVK  
 LWVDTCEIFGGLDICAVALHGK  
 TNTGSAMLEQIAMSDR  
 QGPPQKPPGPAGPTR  
 QTSQQPAGPPAQRRPPQGGPPQPGPGPQR  
 QSRPVAGGPGAPPAARPPASPSQR  
 TSVSGNWK  
 LPSPTAAPQQSASQATPVTQGQGR  
**SQSLTNAFNLPEPAPRPSLSQDEVKAETIR**

**B**

MTQALPR  
 QASISGPATK  
 QTSQQPAGPPAQRRPPQGGPPQPGPGPQR  
 QSRPVAGGPGAPPAARPPASPSQR  
 TSVSGNWK  
 LPSPTAAPQQSASQATPVTQGQGR  
 GSHSQSSSPGALTGR  
 QTAAAAATFSEQVGGGSGGAGR  
 EMLSSTYPVWVK  
 TYATAEPFIDAK  
 DHIEVVGSSMPLIGDHQDEDK  
 SLKPDFVLIR  
 VLLVIDEPHTDWAK  
 KLGTEEFPLIDQTFYPNHK  
 VDNQHDFQDIASVVALTK  
 QLIVELVVNK  
 ASTAAPVASPAAPSPGSSGGGGFFSSLSNAVK  
 VEQAEFSDLNLVAHANGGFSVDMEVLR  
 LGTEEFPLIDQTFYPNHK  
 TNTGSAMLEQIAMSDR

**Figure S2. Tryptic peptide sequences of the 70 kDa proteins identified as synapsin I by MS analysis.** Each of the doublet band proteins immunoprecipitated with anti-NeuN was subjected to MS analysis. The peptide sequences obtained from the upper band (A) and the lower band (B) are shown. The sequence shown in bold letters is unique to the isoform synapsin Ia, and all other sequences are common to two alternatively spliced isoforms of synapsin I, Ia and Ib.
